# Supplementary material for: Synthesis, structures and photoluminescence properties of silver(i) complexes with N,N′-di(pyrazin-2-yl)pyridine-2,6-diamine
Source: Royal Society of Chemistry journal article supplement (doi:10.1039/c0ce00294a), 2010-10-29
Supplement: c0ce00294a.pdf [file c0ce00294a.pdf]

**Supplementary Information**

**Synthesis, Structures and Photoluminescence  
Properties of Silver(I) Complexes with  
*N,N'*-di(pyrazin-2-yl)pyridine-2,6-diamine.**

*Mei-Lin Ho,<sup>\*a</sup> Chien-Hung Shih,<sup>a</sup> Chia-Hwa Lee,<sup>b</sup> and Gene-Hsiang Lee<sup>\*b</sup>*

*<sup>a</sup> Department of Chemistry, Soochow University, Taipei, Taiwan.*

*<sup>b</sup> Instrumentation Center, National Taiwan University, Taipei, Taiwan.*

E-mail: meilin\_ho@scu.edu.tw; ghlee@ntu.edu.tw;

**RECEIVED DATE (to be automatically inserted after your manuscript is  
accepted if required according to the journal that you are submitting your paper  
to)**

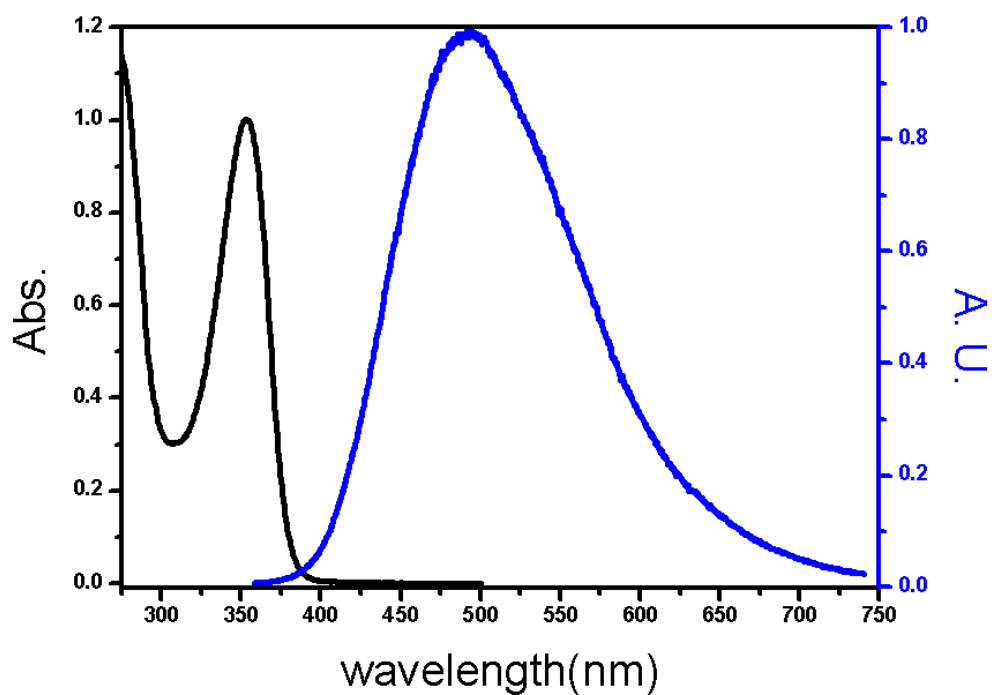

**Figure S1.** The absorption (black line) and emission spectrum (blue line) of **H<sub>2</sub>dpzpa** in  $6 \times 10^{-5}$  M DMF solution.

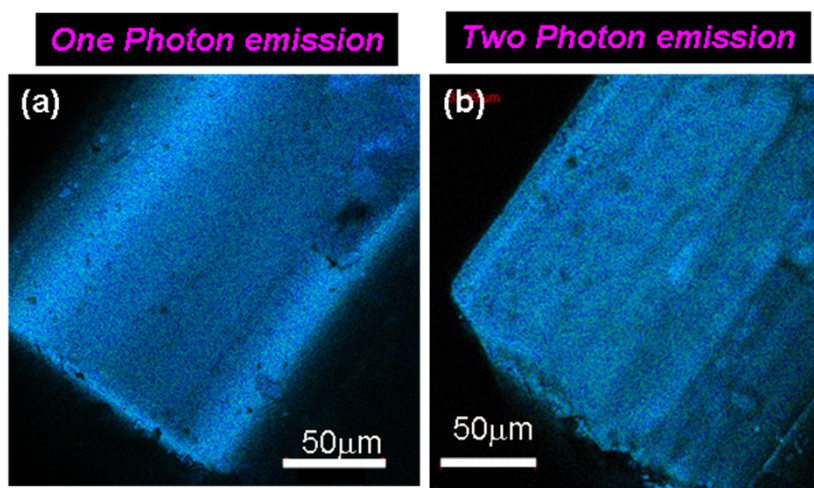

**Figure S2.** (a) The image of one-photon excited emission complex **2**,  $\lambda_{\text{ex}} = 406$  nm. and (b) two-photon excited emission in the solid state,  $\lambda_{\text{ex}} = 800$  nm..
